# Supplementary material for: Biofilm formation capacity and presence of virulence factors among commensal Enterococcus spp. from wild birds
Source: PubMed Central journal article supplement (PMC6671946; doi:10.1038/s41598-019-47602-w), 2019-08-01
Supplement: 41598_2019_47602_MOESM1_ESM.pdf [file 41598_2019_47602_MOESM1_ESM.pdf]

## Supplementary Information

### **Biofilm formation capacity and presence of virulence factors among commensal *Enterococcus* spp. from wild birds**

Dagmara Stępień-Pyśniak<sup>1\*</sup>, Tomasz Hauschild<sup>2</sup>, Urszula Kosikowska<sup>3</sup>, Marta Dec<sup>1</sup>, Renata Urban-Chmiel<sup>1</sup>

<sup>1</sup>Department of Veterinary Prevention and Avian Diseases, Institute of Biological Bases of Animal Diseases, Faculty of Veterinary Medicine, University of Life Sciences in Lublin, Lublin, Poland. <sup>2</sup>Department of Microbiology, Institute of Biology, University of Białystok, Białystok, Poland. <sup>3</sup>Department of Pharmaceutical Microbiology with Laboratory for Microbiological Diagnostics, Medical University in Lublin, Lublin, Poland. \*Correspondence and requests for materials should be addressed to D.S.P. (email: dagmara.stepien@up.lublin.pl)

| Origin <sup>a</sup> | Isolates           | Strain number | Phenotype  |                 |                                         |                                         | Hydrophobicity (%) | Genotypic patterns of virulence factors                                                           |
|---------------------|--------------------|---------------|------------|-----------------|-----------------------------------------|-----------------------------------------|--------------------|---------------------------------------------------------------------------------------------------|
|                     |                    |               | Gelatinase | Beta-haemolysis | Biofilm in TSB +1% glucose <sup>b</sup> | Biofilm in BHI +2% glucose <sup>b</sup> |                    |                                                                                                   |
| White-tailed Eagle  | <i>E. faecalis</i> | 2B            | +          | -               | II                                      | IV                                      | 62.5               | <i>ebpA, ebpB, ebpC, srt, gelE, sprE, efaAfs, fsrA, fsrB, fsrC, cpd, cob, ccf</i>                 |
| White-tailed Eagle  | <i>E. faecalis</i> | 3             | +          | -               | IV                                      | IV                                      | 100                | <i>ebpA, ebpB, ebpC, pil,srt, ace, gelE, sprE, efaAfs, fsrA, fsrB, fsrC, cpd, cob, ccf</i>        |
| Eurasian Tawny Owl  | <i>E. faecalis</i> | 8             | +          | -               | II                                      | IV                                      | 100                | <i>ebpA, ebpB, ebpC, srt, ace, gelE, sprE, efaAfs, fsrA, fsrB, fsrC, cpd, cob, ccf</i>            |
| Little Bittern      | <i>E. faecalis</i> | 11            | +          | -               | II                                      | IV                                      | 50                 | <i>ebpA, ebpB, ebpC, pil,srt, ace, gelE, sprE, efaAfs, fsrA, fsrB, fsrC, cpd, cob, ccf</i>        |
| Hoopoe              | <i>E. faecalis</i> | 12            | +          | -               | II                                      | IV                                      | 70                 | <i>ebpA, ebpB, ebpC, pil,srt, ace, gelE, sprE, efaAfs, fsrA, fsrB, fsrC, cpd, cob, ccf</i>        |
| Mallard             | <i>E. faecalis</i> | 20            | +          | -               | I                                       | I                                       | 0                  | <i>ebpA, ebpB, ebpC, pil,srt, ace, gelE, sprE, efaAfs, fsrA, fsrB, fsrC, cpd, cob, ccf</i>        |
| Mallard             | <i>E. faecalis</i> | 25            | +          | -               | II                                      | IV                                      | 100                | <i>ebpA, ebpB, ebpC, srt, ace, agg, asa1, gelE, sprE, efaAfs, fsrA, fsrB, fsrC, cpd, cob, ccf</i> |
| Mallard             | <i>E. faecalis</i> | 26            | +          | -               | IV                                      | I                                       | 0                  | <i>ebpA, ebpB, ebpC, srt, ace, gelE, sprE, efaAfs, fsrA, fsrB, fsrC, cpd, cob, ccf</i>            |
| Common Blackbird    | <i>E. faecalis</i> | 28            | +          | -               | III                                     | I                                       | 0                  | <i>ebpA, ebpB, pil, srt, ace, gelE, sprE, efaAfs, fsrA, fsrB, fsrC, cpd, cob, ccf</i>             |
| Eurasian Jay        | <i>E. faecalis</i> | 30            | +          | -               | III                                     | III                                     | 44.4               | <i>ebpB, ebpC, ace, gelE, sprE, efaAfs, fsrA, fsrB, fsrC, cpd, cob, ccf</i>                       |
| Short-eared Owl     | <i>E. faecalis</i> | 31            | +          | -               | I                                       | III                                     | 100                | <i>ebpA, ebpB, ebpC, srt, ace, gelE, sprE, efaAfs, fsrA, fsrB, fsrC, cpd, cob, ccf</i>            |

|                           |                    |     |   |   |     |     |      |                                                                                                   |
|---------------------------|--------------------|-----|---|---|-----|-----|------|---------------------------------------------------------------------------------------------------|
| Eurasian Tawny Owl        | <i>E. faecalis</i> | 32  | + | - | III | I   | 0    | <i>ebpB, pil, srt, ace, gelE, sprE, efaAfs, fsrA, fsrB, fsrC, cpd, cob, ccf</i>                   |
| Mallard                   | <i>E. faecalis</i> | 33  | + | - | I   | II  | 33.3 | <i>ebpA, ebpB, pil, srt, ace, asaI, gelE, sprE, efaAfs, fsrA, fsrB, fsrC, cpd, cob, ccf</i>       |
| Little Bittern            | <i>E. faecalis</i> | 35  | + | - | I   | III | 50   | <i>ebpA, ebpB, ebpC, srt, ace, gelE, sprE, efaAfs, fsrA, fsrB, fsrC, cpd, cob, ccf</i>            |
| Eurasian Sparrow Hawk     | <i>E. faecalis</i> | 36  | + | - | I   | III | 57.1 | <i>ebpA, ebpB, ebpC, srt, ace, gelE, sprE, efaAfs, fsrA, fsrB, fsrC, cpd, cob, ccf</i>            |
| Common Buzzard            | <i>E. faecalis</i> | 42  | + | - | II  | III | 100  | <i>ebpC, srt, ace, gelE, sprE, efaAfs, fsrA, fsrB, fsrC, cpd, cob, ccf</i>                        |
| Little Owl                | <i>E. faecalis</i> | 44  | + | - | II  | III | 100  | <i>ebpB, srt, ace, gelE, sprE, efaAfs, fsrA, fsrB, fsrC, cpd, cob, ccf</i>                        |
| White-tailed Eagle        | <i>E. faecalis</i> | 46  | + | - | I   | IV  | 55.6 | <i>ebpA, ebpB, ebpC, srt, ace, agg, asaI, gelE, sprE, efaAfs, fsrA, fsrB, fsrC, cpd, cob, ccf</i> |
| Mallard                   | <i>E. faecalis</i> | 48A | + | - | I   | III | 100  | <i>ebpC, srt, ace, agg, asaI, gelE, sprE, efaAfs, fsrA, fsrB, fsrC, cpd, cob, ccf</i>             |
| Mallard                   | <i>E. faecalis</i> | 50  | + | - | I   | III | 66.7 | <i>srt, ace, agg, asaI, gelE, sprE, efaAfs, fsrA, fsrB, fsrC, cpd, cob, ccf</i>                   |
| Lesser Spotted Woodpecker | <i>E. faecalis</i> | 53  | + | - | III | III | 50   | <i>ebpA, ebpB, ebpC, srt, ace, agg, asaI, gelE, sprE, efaAfs, fsrA, fsrB, fsrC, cpd, cob, ccf</i> |
| European Green Woodpecker | <i>E. faecalis</i> | 54  | + | - | IV  | III | 42.9 | <i>ebpA, ebpC, srt, ace, agg, asaI, gelE, sprE, efaAfs, fsrA, fsrB, fsrC, cpd, cob, ccf</i>       |
| Eurasian Tawny Owl        | <i>E. faecalis</i> | 56  | + | - | III | III | 57.1 | <i>ebpA, ebpB, ebpC, srt, ace, agg, asaI, gelE, sprE, efaAfs, fsrA, fsrB, fsrC, cpd, cob, ccf</i> |
| Great Spotted Woodpecker  | <i>E. faecalis</i> | 58  | + | - | III | III | 42.9 | <i>ebpB, ebpC, srt, ace, agg, asaI, gelE, sprE, efaAfs, fsrA, fsrB, fsrC, cpd, cob, ccf</i>       |

|                        |                    |     |   |   |    |     |      |                                                                                             |
|------------------------|--------------------|-----|---|---|----|-----|------|---------------------------------------------------------------------------------------------|
| Grey Heron             | <i>E. faecalis</i> | 61  | + | - | II | II  | 100  | <i>ebpA, ebpB, srt, ace, agg, asa1, gelE, sprE, efaAfs, fsrA, fsrB, fsrC, cpd, cob, ccf</i> |
| Western Marsh Harrier  | <i>E. faecalis</i> | 62  | + | - | I  | II  | 33.3 | <i>ebpB, ebpC, srt, ace, gelE, sprE, efaAfs, fsrA, fsrB, fsrC, cpd, cob, ccf</i>            |
| Grey Heron             | <i>E. faecalis</i> | 64A | + | - | II | III | 100  | <i>ebpA, ebpB, srt, ace, gelE, sprE, efaAfs, fsrA, fsrB, fsrC, cpd, cob, ccf</i>            |
| Great Egret            | <i>E. faecium</i>  | 1   | - | - | I  | I   | 14.3 | <i>efaAfm, ccf</i>                                                                          |
| White-tailed Eagle     | <i>E. faecium</i>  | 2A  | - | - | I  | III | 25   | <i>efaAfm, ccf</i>                                                                          |
| Mute Swan              | <i>E. faecium</i>  | 5   | - | - | I  | III | 10   | <i>efaAfm, ccf</i>                                                                          |
| Common Raven           | <i>E. faecium</i>  | 10  | - | - | I  | III | 37.5 | <i>efaAfm, ccf</i>                                                                          |
| Eurasian Golden Oriole | <i>E. faecium</i>  | 13  | - | - | I  | III | 0    | <i>efaAfm, ccf</i>                                                                          |
| Eurasian Sparrow Hawk  | <i>E. faecium</i>  | 14  | - | - | I  | IV  | 0    | <i>efaAfm, ccf</i>                                                                          |
| Common Buzzard         | <i>E. faecium</i>  | 15  | - | - | I  | IV  | 44.4 | <i>efaAfm, ccf</i>                                                                          |
| Common Tern            | <i>E. faecium</i>  | 16  | - | - | I  | IV  | 0    | <i>ebpC, srt, ace, gelE, sprE, efaAfm, fsrA, fsrB, fsrC, cpd, ccf</i>                       |
| Mallard                | <i>E. faecium</i>  | 17  | - | - | II | IV  | 66.7 | <i>efaAfm, ccf</i>                                                                          |
| Mallard                | <i>E. faecium</i>  | 19A | - | - | I  | III | 0    | <i>efaAfm</i>                                                                               |
| Mallard                | <i>E. faecium</i>  | 19B | - | - | I  | III | 0    | <i>efaAfm, ccf</i>                                                                          |
| Mallard                | <i>E. faecium</i>  | 22  | - | - | I  | III | 0    | <i>efaAfm, ccf</i>                                                                          |
| Fieldfare              | <i>E. faecium</i>  | 29  | - | - | IV | II  | 0    | <i>efaAfm, ccf</i>                                                                          |
| Mallard                | <i>E. faecium</i>  | 34  | - | - | I  | I   | 0    | <i>ebpA, ebpC, srt, ace, gelE, sprE, efaAfm, fsrA, fsrB, fsrC, cpd, cob, ccf</i>            |
| Mallard                | <i>E. faecium</i>  | 38A | - | - | II | II  | 12.5 | <i>ebpA, ebpC, srt, ace, gelE, sprE, efaAfm, fsrA, fsrB, fsrC, cpd, ccf</i>                 |
| Mallard                | <i>E. faecium</i>  | 39A | + | - | II | III | 0    | <i>ebpA, srt, ace, gelE, sprE, efaAfm, fsrA, fsrB, fsrC, cpd, ccf</i>                       |

|                           |                         |    |   |   |    |     |      |                                                                                             |
|---------------------------|-------------------------|----|---|---|----|-----|------|---------------------------------------------------------------------------------------------|
| Short-eared Owl           | <i>E. faecium</i>       | 57 | - | - | I  | I   | 0    | <i>ebpA, ebpC, srt, ace, agg, asaI, gelE, sprE, efaAfm, fsrA, fsrB, fsrC, cpd, cob, ccf</i> |
| European Green Woodpecker | <i>E. faecium</i>       | 60 | - | - | I  | II  | 10   | <i>ebpC, srt, asaI, efaAfm, ccf</i>                                                         |
| White Stork               | <i>E. hirae</i>         | 4  | - | - | II | IV  | 22.2 | <i>ebpC, ccf</i>                                                                            |
| Mallard                   | <i>E. hirae</i>         | 23 | - | - | I  | III | 0    | -                                                                                           |
| Mallard                   | <i>E. hirae</i>         | 41 | - | - | II | II  | 0    | <i>srt, gelE, sprE, fsrA, fsrC, cpd, ccf</i>                                                |
| Barn Owl                  | <i>E. hirae</i>         | 43 | - | - | II | III | 28.6 | <i>ebpC, srt, asaI, gelE, sprE, fsrA, fsrC, cpd, cob, ccf</i>                               |
| Long-eared Owl            | <i>E. hirae</i>         | 45 | + | - | I  | II  | 37.5 | <i>ebpA, ebpC, pil, srt, ace, gelE, sprE, fsrA, fsrB, fsrC, cpd, cob, ccf</i>               |
| Mallard                   | <i>E. durans</i>        | 24 | - | - | I  | III | 22.2 | <i>ccf</i>                                                                                  |
| Mallard                   | <i>E. durans</i>        | 37 | - | - | I  | II  | 42.9 | <i>ccf</i>                                                                                  |
| Mallard                   | <i>E. casseliflavus</i> | 49 | - | - | I  | IV  | 62.5 | <i>ebpC, ccf</i>                                                                            |
| Mallard                   | <i>E. casseliflavus</i> | 52 | - | - | I  | III | 42.9 | <i>ebpC, ccf</i>                                                                            |

Table S1. Phenotypic and genotypic properties in *Enterococcus* strains isolated from wild birds.

<sup>a</sup> Western Marsh Harrier (*Circus aeruginosus*), White-tailed Eagle (*Haliaeetus albicilla*), Eurasian Sparrow Hawk (*Accipiter nisus*), Common Buzzard (*Buteo buteo*), Lesser Spotted Woodpecker (*Dendrocopos minor*), Great Spotted Woodpecker (*Dendrocopos major*), European Green Woodpecker (*Picus viridis*), Mute Swan (*Cygnus olor*), Mallard (*Anas platyrhynchos*), Barn Owl (*Tyto alba*), Little Owl (*Athene noctua*), Eurasian Tawny Owl (*Strix aluco*), Long-eared Owl (*Asio otus*), Short-eared Owl (*Asio flammeus*), Eurasian Golden Oriole (*Oriolus oriolus*), Little Bittern (*Ixobrychus minutus*), Grey Heron (*Ardea cinerea*), Great Egret (*Ardea alba*), Hoopoe (*Upupa epos*), Fieldfare (*Turdus pilaris*),

Common Blackbird (*Turdus merula*), Eurasian Jay (*Garrulus glandarius*), Common Raven (*Corvus corax*), Common Tern (*Sterna hirundo*),  
White Stork (*Ciconia ciconia*)

<sup>b</sup> Category of biofilm formation: I- no biofilm; II- weak biofilm; III- moderate biofilm; IV- strong biofilm

---

| <b>Genes</b>             | <b>Encoded virulence factor</b>                                        | <b>Primer sequence 5' – 3'</b>                       | <b>Annealing temperature</b> | <b>Amplicon length (bp)</b> | <b>Reference</b> |
|--------------------------|------------------------------------------------------------------------|------------------------------------------------------|------------------------------|-----------------------------|------------------|
| <i>ebpA</i>              | endocarditis and biofilm-associated pili<br>(fibre tip pilin)          | F: CCATTGTCAGAAGCAAGAATG<br>R: GAGTGAAAGTTCCTCCTCTAG | 54                           | 613                         | 1                |
| <i>ebpB</i>              | endocarditis and biofilm-associated pili<br>(cell wall-anchored pilin) | F: CATTAGCAGAGGCATCGCAA<br>R: CAAGTGGTGGTAAGTCATAGG  | 54                           | 504                         | 1                |
| <i>ebpC</i>              | endocarditis and biofilm-associated pili<br>(major shaft pilin)        | F: CTGCTACGAATATGGTGGTG<br>R: GGTGTTTGATTGTTTGCTTC   | 54                           | 487                         | 1                |
| <i>pil</i>               | pili                                                                   | F: GAAGAAACCAAGCACCTAC<br>R: CTACCTAAGAAAAGAAACGCG   | 54                           | 620                         | 1                |
| <i>srt</i>               | pilus-associated sortase                                               | F: GTATCCTTTTGTTAGCGATGC<br>R: TGTCTCGAACTAATAACCGA  | 54                           | 612                         | 1                |
| <i>ace</i>               | collagen-binding protein                                               | F: AAAGTAGAATTAGATCCACAC<br>R: TCTATCACATTCGGTTGCG   | 48                           | 320                         | 2                |
| <i>agg</i>               | aggregation substance                                                  | F: CACGTAATTCTTGCCCACCA<br>R: CAAGCATTATTGGCAGCGTT   | 55                           | 520                         | 3                |
| <i>asa1</i>              | aggregation substance                                                  | F: GCACGCTATTACGAACTATGA<br>R: TAAGAAAGAACATCACCACGA | 56                           | 375                         | 4                |
| <i>esp</i>               | enterococcal surface protein                                           | F: AGATTCATCTTTGATTCTTGG<br>R: AATTGATTCTTTAGCATCTGG | 56                           | 510                         | 4                |
| <i>efaA<sub>fs</sub></i> | <i>E. faecalis</i> specific endocarditis antigen                       | F: GACAGACCCTCACGAATA<br>R: AGTTCATCATGCTGTAGTA      | 51                           | 705                         | 5                |

|                          |                                           |                                                                       |    |      |   |
|--------------------------|-------------------------------------------|-----------------------------------------------------------------------|----|------|---|
| <i>efaA<sub>fm</sub></i> | <i>E.faecium</i> specific surface antigen | F: AACAGATCCGCATGAATA<br>R: CATTTCATCATCTGATAGTA                      | 48 | 735  | 5 |
| <i>gelE</i>              | gelatinase                                | F: ACCCCGTATCATTGGTTT<br>R: ACGCATTGCTTTTCCATC                        | 48 | 419  | 6 |
| <i>sprE</i>              | serine protease                           | F: TTGAGCTCCGTTCTGCCGAAAGTCATTC<br>R: TTGGTACCGATTGGGGAACCAGATTGACC   | 55 | 591  | 6 |
| <i>hyl</i>               | hyaluronidase                             | F: ACAGAAGAGCTGCAGGAAATG<br>R: GACTGACGTCCAAGTTTCCAA                  | 56 | 276  | 4 |
| <i>fsrA</i>              | response regulator                        | F: ATGAGTGAACAAATGGCTATTTA<br>R: CTAAGTAAGAAATAGTGCCTTGA              | 49 | 740  | 6 |
| <i>fsrB</i>              | signalling peptide                        | F: GGGAGCTCTGGACAAAGTATTATCTAACCG<br>R: TTGGTACCCACACCATCACTGACTTTTGC | 63 | 566  | 6 |
| <i>fsrC</i>              | histidine kinase                          | F: ATGATTTTGTCTGTTATTAGCTACT<br>R: CATCGTTAACAACTTTTTACTG             | 49 | 1343 | 6 |
| <i>cylA</i>              | cytolysin activator                       | F: ACTCGGGGATTGATAGGC<br>R: GCTGCTAAAGCTGCGCTT                        | 56 | 688  | 4 |
| <i>cylB</i>              | transport of cytolysin                    | F: ATTCCTACCTATGTTCTGTTA<br>R: AATAAACTCTTCTTTTCCAAC                  | 51 | 843  | 5 |
| <i>cylM</i>              | cytolysin synthetase                      | F: CTGATGGAAAGAAGATAGTAT<br>R: TGAGTTGGTCTGATTACATTT                  | 53 | 742  | 5 |

|             |                     |                                                         |    |      |   |
|-------------|---------------------|---------------------------------------------------------|----|------|---|
| <i>cylL</i> | cytolysin precursor | F: GCTTCACCTCACTAAGTTTTATAG<br>R: GATGGAGGGTAAGAATTATGG | 53 | 253  | 7 |
| <i>cpd</i>  | sex pheromone       | F: TGGTGGGTTATTTTTCAATTC<br>R: TACGGCTCTGGCTTACTA       | 48 | 782  | 5 |
| <i>cob</i>  | sex pheromone       | F: AACATTCAGCAAACAAAGC<br>R: TTGTCATAAAGAGTGGTCAT       | 51 | 1405 | 5 |
| <i>ccf</i>  | sex pheromone       | F: GGGAATTGAGTAGTGAAGAAG<br>R: AGCCGCTAAAATCGGTAAAAT    | 52 | 543  | 5 |

Table S2. Target genes and primers used in this study.

1. Hashem, Y.A., Amin, H.M., Essam, T.M. & Aziz, R.K. Biofilm formation in enterococci: genotype-phenotype correlations and inhibition by vancomycin. *Sci Rep.* **7**, 5733 (2017).
2. Duprè, I., Zanetti, S., Schito, A.M., Fadda, G. & Sechi, L.A. Incidence of virulence determinants in clinical *Enterococcus faecium* and *Enterococcus faecalis* isolates collected in Sardinia (Italy). *J Med Microbiol.* **52**, 491-498 (2003).
3. Seputiene, V., Bogdaite, A., Ruzauskas, M. & Suziedeliene, E. Antibiotic resistance genes and virulence factors in *Enterococcus faecium* and *Enterococcus faecalis* from diseased farm animals: pigs, cattle and poultry. *Pol J Vet Sci.* **15**, 431-438 (2012).
4. Vankerckhoven, V., et al. Development of a multiplex PCR for the detection of *asa1*, *gelE*, *cylA*, *esp*, and *hyl* genes in enterococci and survey for virulence determinants among European hospital isolates of *Enterococcus faecium*. *J Clin Microbiol.* **42**, 4473-4479 (2004).

5. Eaton, T.J. & Gasson, M.J. Molecular screening of *Enterococcus* virulence determinants and potential for genetic exchange between food and medical isolates. *Appl Environ Microbiol.* **67**, 1628-1635 (2001).
  6. Lopes Mde, F., Simões, A.P., Tenreiro, R., Marques, J.J. & Crespo, M.T. Activity and expression of a virulence factor, gelatinase, in dairy enterococci. *Int J Food Microbiol.* **112**, 208-214 (2006).
  7. Semedo, T., et al. Comparative study using type strains and clinical and food isolates to examine hemolytic activity and occurrence of the cyl operon in enterococci. *J Clin Microbiol.* **41**, 2569-76 (2003).
-
